# Supplementary material for: Back from the dead; the curious tale of the predatory cyanobacterium Vampirovibrio chlorellavorus
Source: PeerJ journal article supplement (doi:10.7717/peerj.968), 2015-05-21

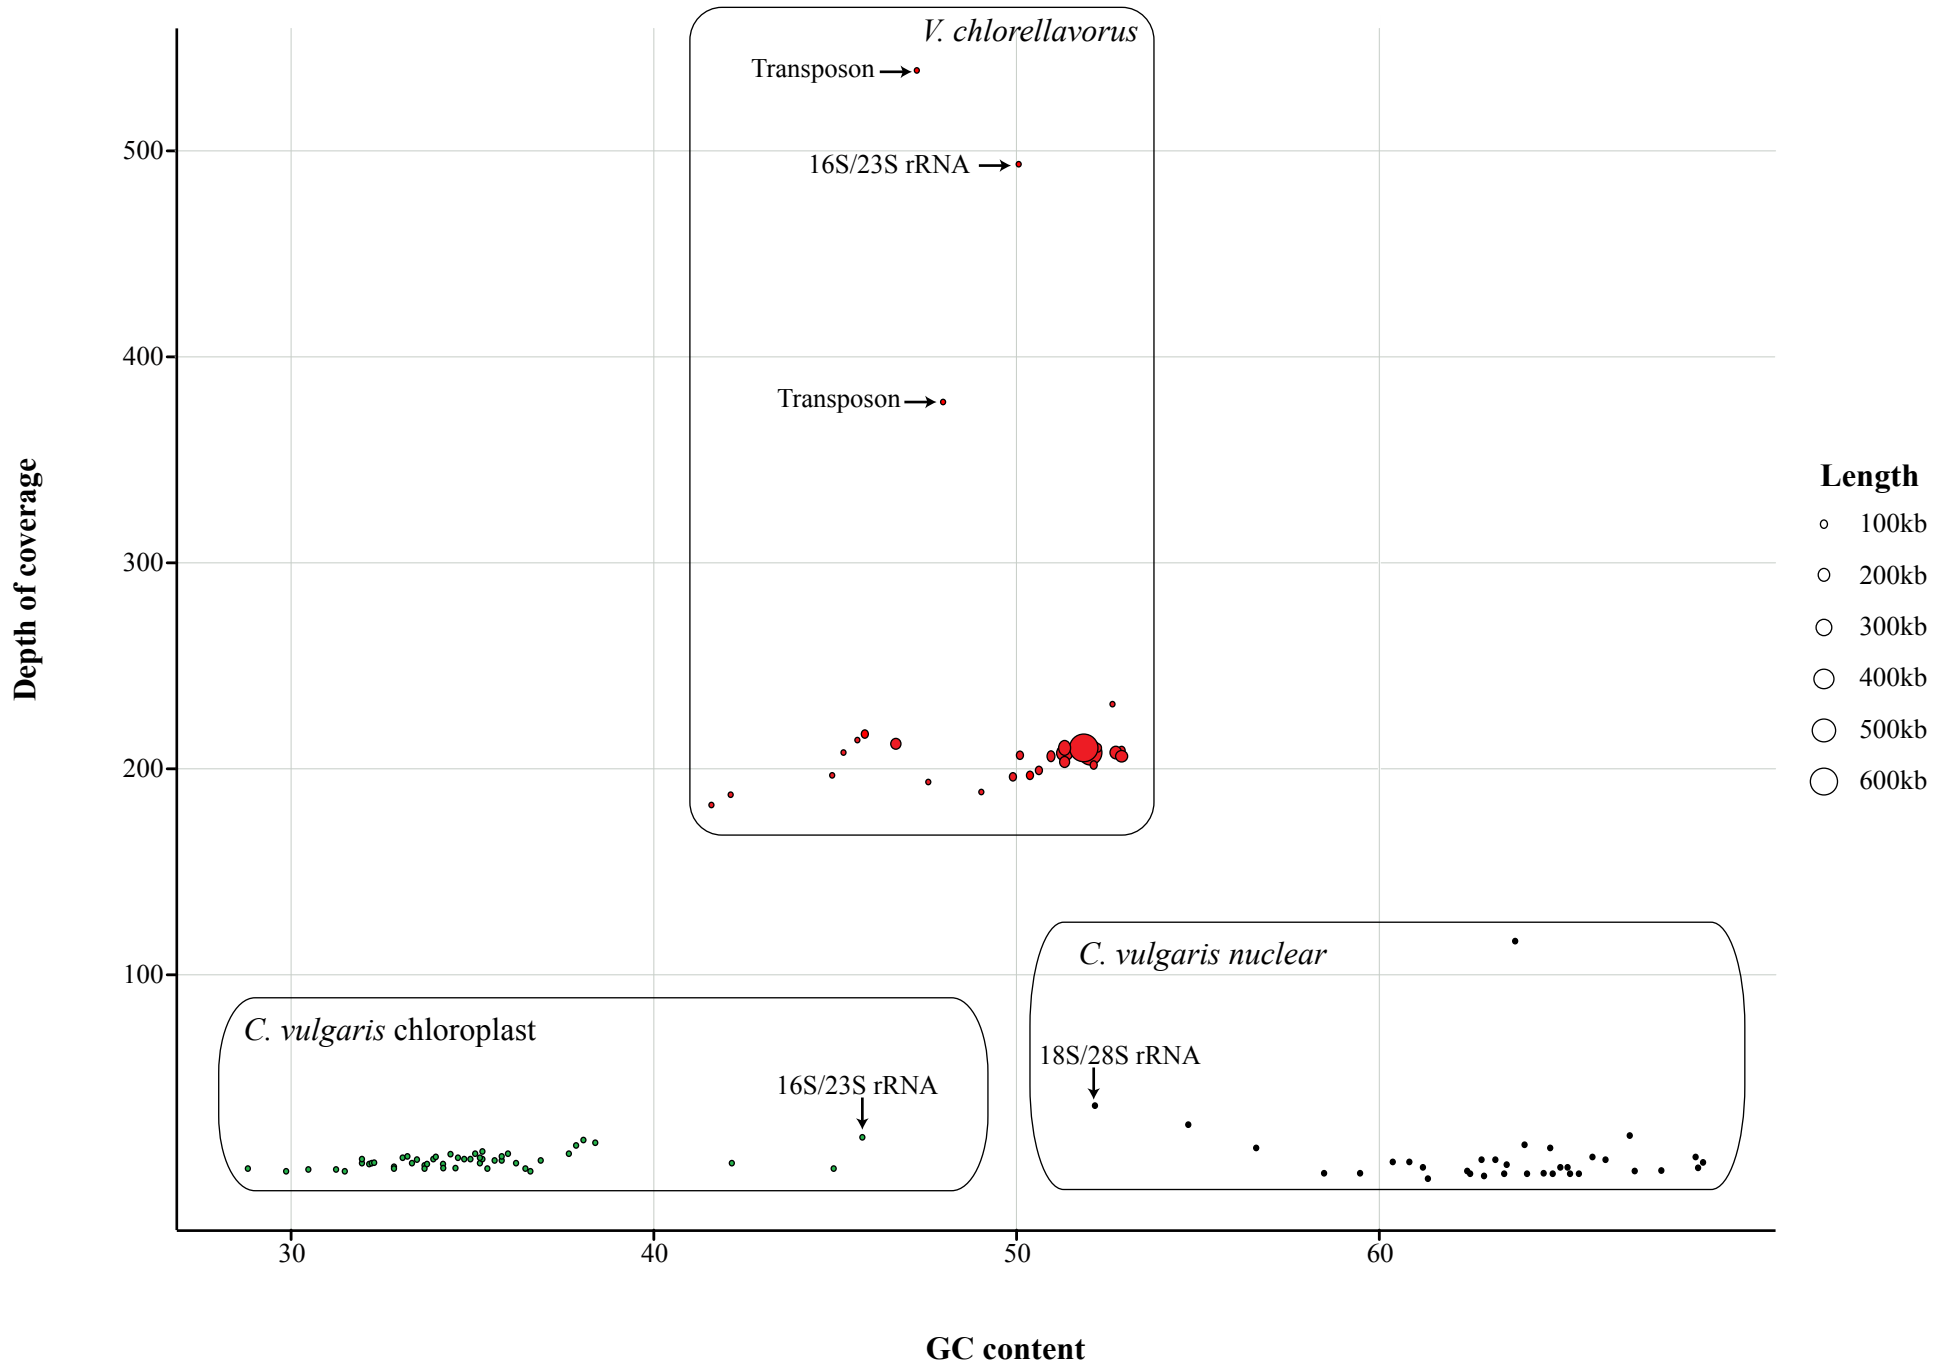

Supplement: Figure_S1.pdf [file Figure_S1.pdf]
